# Supplementary material
Source: PubMed Central journal article supplement (PMC4968197)
Supplement: NIHMS773127-supplement.pdf [file NIHMS773127-supplement.pdf]

## Appendix

### PROMIS Physical Function

In these studies, we analyzed slightly different forms of the PROMIS Physical Function instrument. For the COPD, Back Pain, and Depression studies, we analyzed the CAT v1.0 version, which adaptively selects items from the 1.0 bank. For the Rheumatoid Arthritis study, we administered the Short Form v1.0 10a. For the Cancer study, we administered a unique 10-item short form. All of the items in both of these short forms were also in the bank; because the items were calibrated together, T-scores obtained from any version (CAT and short-form) are comparable.

### Instruments included in this Appendix:

PROMIS Short Form v1.0 – Physical Function 10a

PROMIS Item Bank v1.2 – Physical Function\*

We recommend the use of the short form. Users interested in CAT versions or for additional questions, please visit [www.assessmentcenter.net](http://www.assessmentcenter.net).

\*Physical Function items administered in the Cancer study are marked with an asterisk (\*) next to the variable name. The original PROMIS Bank version v1.0 – Physical Function included 124 items after being tested in a diverse sample. Later, during an effort to translate instrument items into multiple languages, translation challenges were identified. Therefore, minor modifications to the English source items were required (e.g. metric equivalents to measurements such as “Over 10 pounds/ 5 kg” were added). These modifications (19 in total) resulted in the creation of a version 1.1 item bank. Later, version 1.2 was created by eliminating three items due to restrictions in their use: PFA7, PFC20, and PFC34.

## Physical Function – Short Form 10a

**Please respond to each item by marking one box per row.**

|        |                                                                                                                                              | <b>Not at all</b>             | <b>Very little</b>              | <b>Somewhat</b>               | <b>Quite a lot</b>            | <b>Cannot do</b>              |
|--------|----------------------------------------------------------------------------------------------------------------------------------------------|-------------------------------|---------------------------------|-------------------------------|-------------------------------|-------------------------------|
| PFA01* | Does your health now limit you in doing vigorous activities, such as running, lifting heavy objects, participating in strenuous sports?..... | <input type="checkbox"/><br>5 | <input type="checkbox"/><br>4   | <input type="checkbox"/><br>3 | <input type="checkbox"/><br>2 | <input type="checkbox"/><br>1 |
| PFC36  | Does your health now limit you in walking more than a mile?.....                                                                             | <input type="checkbox"/><br>5 | <input type="checkbox"/><br>4   | <input type="checkbox"/><br>3 | <input type="checkbox"/><br>2 | <input type="checkbox"/><br>1 |
| PFC37  | Does your health now limit you in climbing one flight of stairs?.....                                                                        | <input type="checkbox"/><br>5 | <input type="checkbox"/><br>4   | <input type="checkbox"/><br>3 | <input type="checkbox"/><br>2 | <input type="checkbox"/><br>1 |
| PFA05  | Does your health now limit you in lifting or carrying groceries?.....                                                                        | <input type="checkbox"/><br>5 | <input type="checkbox"/><br>4   | <input type="checkbox"/><br>3 | <input type="checkbox"/><br>2 | <input type="checkbox"/><br>1 |
| PFA03  | Does your health now limit you in bending, kneeling, or stooping?.....                                                                       | <input type="checkbox"/><br>5 | <input type="checkbox"/><br>4   | <input type="checkbox"/><br>3 | <input type="checkbox"/><br>2 | <input type="checkbox"/><br>1 |
|        |                                                                                                                                              | <b>Without any difficulty</b> | <b>With a little difficulty</b> | <b>With some difficulty</b>   | <b>With much difficulty</b>   | <b>Unable to do</b>           |
| PFA11  | Are you able to do chores such as vacuuming or yard work?.....                                                                               | <input type="checkbox"/><br>5 | <input type="checkbox"/><br>4   | <input type="checkbox"/><br>3 | <input type="checkbox"/><br>2 | <input type="checkbox"/><br>1 |
| PFA16  | Are you able to dress yourself, including tying shoelaces and doing buttons?.....                                                            | <input type="checkbox"/><br>5 | <input type="checkbox"/><br>4   | <input type="checkbox"/><br>3 | <input type="checkbox"/><br>2 | <input type="checkbox"/><br>1 |
| PFB26  | Are you able to shampoo your hair?.....                                                                                                      | <input type="checkbox"/><br>5 | <input type="checkbox"/><br>4   | <input type="checkbox"/><br>3 | <input type="checkbox"/><br>2 | <input type="checkbox"/><br>1 |
| PFA55  | Are you able to wash and dry your body?.....                                                                                                 | <input type="checkbox"/><br>5 | <input type="checkbox"/><br>4   | <input type="checkbox"/><br>3 | <input type="checkbox"/><br>2 | <input type="checkbox"/><br>1 |
| PFC45  | Are you able to get on and off the toilet?.....                                                                                              | <input type="checkbox"/><br>5 | <input type="checkbox"/><br>4   | <input type="checkbox"/><br>3 | <input type="checkbox"/><br>2 | <input type="checkbox"/><br>1 |

## Physical Function

Please respond to each item by marking one box per row.

|         |                                                                                                | Without<br>any<br>difficulty  | With a<br>little<br>difficulty | With<br>some<br>difficulty    | With<br>much<br>difficulty    | Unable<br>to do               |
|---------|------------------------------------------------------------------------------------------------|-------------------------------|--------------------------------|-------------------------------|-------------------------------|-------------------------------|
| PFA10   | Are you able to stand for one hour? .....                                                      | <input type="checkbox"/><br>5 | <input type="checkbox"/><br>4  | <input type="checkbox"/><br>3 | <input type="checkbox"/><br>2 | <input type="checkbox"/><br>1 |
| PFA11*  | Are you able to do chores such as vacuuming or yard work? .....                                | <input type="checkbox"/><br>5 | <input type="checkbox"/><br>4  | <input type="checkbox"/><br>3 | <input type="checkbox"/><br>2 | <input type="checkbox"/><br>1 |
| PFA12   | Are you able to push open a heavy door?.....                                                   | <input type="checkbox"/><br>5 | <input type="checkbox"/><br>4  | <input type="checkbox"/><br>3 | <input type="checkbox"/><br>2 | <input type="checkbox"/><br>1 |
| PFA13   | Are you able to exercise for an hour?.....                                                     | <input type="checkbox"/><br>5 | <input type="checkbox"/><br>4  | <input type="checkbox"/><br>3 | <input type="checkbox"/><br>2 | <input type="checkbox"/><br>1 |
| PFA14r1 | Are you able to carry a heavy object (over 10 pounds/5 kg)? .....                              | <input type="checkbox"/><br>5 | <input type="checkbox"/><br>4  | <input type="checkbox"/><br>3 | <input type="checkbox"/><br>2 | <input type="checkbox"/><br>1 |
| PFA15   | Are you able to stand up from an armless straight chair? .....                                 | <input type="checkbox"/><br>5 | <input type="checkbox"/><br>4  | <input type="checkbox"/><br>3 | <input type="checkbox"/><br>2 | <input type="checkbox"/><br>1 |
| PFA16r1 | Are you able to dress yourself, including tying shoelaces and buttoning up your clothes? ..... | <input type="checkbox"/><br>5 | <input type="checkbox"/><br>4  | <input type="checkbox"/><br>3 | <input type="checkbox"/><br>2 | <input type="checkbox"/><br>1 |
| PFA17   | Are you able to reach into a high cupboard?.....                                               | <input type="checkbox"/><br>5 | <input type="checkbox"/><br>4  | <input type="checkbox"/><br>3 | <input type="checkbox"/><br>2 | <input type="checkbox"/><br>1 |

|         |                                                                                          | Without<br>any<br>difficulty  | With a<br>little<br>difficulty | With<br>some<br>difficulty    | With<br>much<br>difficulty    | Unable<br>to do               |
|---------|------------------------------------------------------------------------------------------|-------------------------------|--------------------------------|-------------------------------|-------------------------------|-------------------------------|
| PFA18   | Are you able to use a hammer to pound a nail?.....                                       | <input type="checkbox"/><br>5 | <input type="checkbox"/><br>4  | <input type="checkbox"/><br>3 | <input type="checkbox"/><br>2 | <input type="checkbox"/><br>1 |
| PFA19r1 | Are you able to run or jog for two miles (3km)?...                                       | <input type="checkbox"/><br>5 | <input type="checkbox"/><br>4  | <input type="checkbox"/><br>3 | <input type="checkbox"/><br>2 | <input type="checkbox"/><br>1 |
| PFA20   | Are you able to cut your food using eating utensils?.....                                | <input type="checkbox"/><br>5 | <input type="checkbox"/><br>4  | <input type="checkbox"/><br>3 | <input type="checkbox"/><br>2 | <input type="checkbox"/><br>1 |
| PFA21*  | Are you able to go up and down stairs at a normal pace?.....                             | <input type="checkbox"/><br>5 | <input type="checkbox"/><br>4  | <input type="checkbox"/><br>3 | <input type="checkbox"/><br>2 | <input type="checkbox"/><br>1 |
| PFA22   | Are you able to open previously opened jars?.....                                        | <input type="checkbox"/><br>5 | <input type="checkbox"/><br>4  | <input type="checkbox"/><br>3 | <input type="checkbox"/><br>2 | <input type="checkbox"/><br>1 |
| PFA23   | Are you able to go for a walk of at least 15 minutes?.....                               | <input type="checkbox"/><br>5 | <input type="checkbox"/><br>4  | <input type="checkbox"/><br>3 | <input type="checkbox"/><br>2 | <input type="checkbox"/><br>1 |
| PFA25   | Are you able to do yard work like raking leaves, weeding, or pushing a lawn mower? ..... | <input type="checkbox"/><br>5 | <input type="checkbox"/><br>4  | <input type="checkbox"/><br>3 | <input type="checkbox"/><br>2 | <input type="checkbox"/><br>1 |
| PFA28   | Are you able to open a can with a hand can opener?.....                                  | <input type="checkbox"/><br>5 | <input type="checkbox"/><br>4  | <input type="checkbox"/><br>3 | <input type="checkbox"/><br>2 | <input type="checkbox"/><br>1 |

|         |                                                                                      | <b>Without<br/>any<br/>difficulty</b> | <b>With a<br/>little<br/>difficulty</b> | <b>With<br/>some<br/>difficulty</b> | <b>With<br/>much<br/>difficulty</b> | <b>Unable<br/>to do</b>       |
|---------|--------------------------------------------------------------------------------------|---------------------------------------|-----------------------------------------|-------------------------------------|-------------------------------------|-------------------------------|
| PFA29r1 | Are you able to pull heavy objects (10 pounds/<br>5kg) towards yourself? .....       | <input type="checkbox"/><br>5         | <input type="checkbox"/><br>4           | <input type="checkbox"/><br>3       | <input type="checkbox"/><br>2       | <input type="checkbox"/><br>1 |
| PFA30   | Are you able to step up and down curbs?.....                                         | <input type="checkbox"/><br>5         | <input type="checkbox"/><br>4           | <input type="checkbox"/><br>3       | <input type="checkbox"/><br>2       | <input type="checkbox"/><br>1 |
| PFA31r1 | Are you able to get up from the floor from lying<br>on your back without help? ..... | <input type="checkbox"/><br>5         | <input type="checkbox"/><br>4           | <input type="checkbox"/><br>3       | <input type="checkbox"/><br>2       | <input type="checkbox"/><br>1 |
| PFA32   | Are you able to stand with your knees<br>straight?.....                              | <input type="checkbox"/><br>5         | <input type="checkbox"/><br>4           | <input type="checkbox"/><br>3       | <input type="checkbox"/><br>2       | <input type="checkbox"/><br>1 |
| PFA33   | Are you able to exercise hard for half an hour?.....                                 | <input type="checkbox"/><br>5         | <input type="checkbox"/><br>4           | <input type="checkbox"/><br>3       | <input type="checkbox"/><br>2       | <input type="checkbox"/><br>1 |
| PFA34   | Are you able to wash your back?.....                                                 | <input type="checkbox"/><br>5         | <input type="checkbox"/><br>4           | <input type="checkbox"/><br>3       | <input type="checkbox"/><br>2       | <input type="checkbox"/><br>1 |
| PFA35   | Are you able to open and close a zipper?.....                                        | <input type="checkbox"/><br>5         | <input type="checkbox"/><br>4           | <input type="checkbox"/><br>3       | <input type="checkbox"/><br>2       | <input type="checkbox"/><br>1 |
| PFA36   | Are you able to put on and take off a coat or<br>jacket?.....                        | <input type="checkbox"/><br>5         | <input type="checkbox"/><br>4           | <input type="checkbox"/><br>3       | <input type="checkbox"/><br>2       | <input type="checkbox"/><br>1 |
| PFA37   | Are you able to stand for short periods of<br>time?.....                             | <input type="checkbox"/><br>5         | <input type="checkbox"/><br>4           | <input type="checkbox"/><br>3       | <input type="checkbox"/><br>2       | <input type="checkbox"/><br>1 |

|         |                                                                    | <b>Without<br/>any<br/>difficulty</b> | <b>With a<br/>little<br/>difficulty</b> | <b>With<br/>some<br/>difficulty</b> | <b>With<br/>much<br/>difficulty</b> | <b>Unable<br/>to do</b>       |
|---------|--------------------------------------------------------------------|---------------------------------------|-----------------------------------------|-------------------------------------|-------------------------------------|-------------------------------|
| PFA38   | Are you able to dry your back with a towel?.....                   | <input type="checkbox"/><br>5         | <input type="checkbox"/><br>4           | <input type="checkbox"/><br>3       | <input type="checkbox"/><br>2       | <input type="checkbox"/><br>1 |
| PFA39r1 | Are you able to run at a fast pace for two miles (3 km)?.....      | <input type="checkbox"/><br>5         | <input type="checkbox"/><br>4           | <input type="checkbox"/><br>3       | <input type="checkbox"/><br>2       | <input type="checkbox"/><br>1 |
| PFA40   | Are you able to turn a key in a lock?.....                         | <input type="checkbox"/><br>5         | <input type="checkbox"/><br>4           | <input type="checkbox"/><br>3       | <input type="checkbox"/><br>2       | <input type="checkbox"/><br>1 |
| PFA41   | Are you able to squat and get up?.....                             | <input type="checkbox"/><br>5         | <input type="checkbox"/><br>4           | <input type="checkbox"/><br>3       | <input type="checkbox"/><br>2       | <input type="checkbox"/><br>1 |
| PFA42   | Are you able to carry a laundry basket up a flight of stairs?..... | <input type="checkbox"/><br>5         | <input type="checkbox"/><br>4           | <input type="checkbox"/><br>3       | <input type="checkbox"/><br>2       | <input type="checkbox"/><br>1 |
| PFA43   | Are you able to write with a pen or pencil?.....                   | <input type="checkbox"/><br>5         | <input type="checkbox"/><br>4           | <input type="checkbox"/><br>3       | <input type="checkbox"/><br>2       | <input type="checkbox"/><br>1 |
| PFA44   | Are you able to put on a shirt or blouse?.....                     | <input type="checkbox"/><br>5         | <input type="checkbox"/><br>4           | <input type="checkbox"/><br>3       | <input type="checkbox"/><br>2       | <input type="checkbox"/><br>1 |
| PFA45   | Are you able to get out of bed into a chair?.....                  | <input type="checkbox"/><br>5         | <input type="checkbox"/><br>4           | <input type="checkbox"/><br>3       | <input type="checkbox"/><br>2       | <input type="checkbox"/><br>1 |
| PFA47   | Are you able to pull on trousers?.....                             | <input type="checkbox"/><br>5         | <input type="checkbox"/><br>4           | <input type="checkbox"/><br>3       | <input type="checkbox"/><br>2       | <input type="checkbox"/><br>1 |

|        |                                                             | Without<br>any<br>difficulty  | With a<br>little<br>difficulty | With<br>some<br>difficulty    | With<br>much<br>difficulty    | Unable<br>to do               |
|--------|-------------------------------------------------------------|-------------------------------|--------------------------------|-------------------------------|-------------------------------|-------------------------------|
| PFA48  | Are you able to peel fruit?.....                            | <input type="checkbox"/><br>5 | <input type="checkbox"/><br>4  | <input type="checkbox"/><br>3 | <input type="checkbox"/><br>2 | <input type="checkbox"/><br>1 |
| PFA49  | Are you able to bend or twist your back?.....               | <input type="checkbox"/><br>5 | <input type="checkbox"/><br>4  | <input type="checkbox"/><br>3 | <input type="checkbox"/><br>2 | <input type="checkbox"/><br>1 |
| PFA50  | Are you able to brush your teeth?.....                      | <input type="checkbox"/><br>5 | <input type="checkbox"/><br>4  | <input type="checkbox"/><br>3 | <input type="checkbox"/><br>2 | <input type="checkbox"/><br>1 |
| PFA51  | Are you able to sit on the edge of a bed?.....              | <input type="checkbox"/><br>5 | <input type="checkbox"/><br>4  | <input type="checkbox"/><br>3 | <input type="checkbox"/><br>2 | <input type="checkbox"/><br>1 |
| PFA52  | Are you able to tie your shoelaces?.....                    | <input type="checkbox"/><br>5 | <input type="checkbox"/><br>4  | <input type="checkbox"/><br>3 | <input type="checkbox"/><br>2 | <input type="checkbox"/><br>1 |
| PFA53* | Are you able to run errands and shop?.....                  | <input type="checkbox"/><br>5 | <input type="checkbox"/><br>4  | <input type="checkbox"/><br>3 | <input type="checkbox"/><br>2 | <input type="checkbox"/><br>1 |
| PFA54  | Are you able to button your shirt?.....                     | <input type="checkbox"/><br>5 | <input type="checkbox"/><br>4  | <input type="checkbox"/><br>3 | <input type="checkbox"/><br>2 | <input type="checkbox"/><br>1 |
| PFA55  | Are you able to wash and dry your body?.....                | <input type="checkbox"/><br>5 | <input type="checkbox"/><br>4  | <input type="checkbox"/><br>3 | <input type="checkbox"/><br>2 | <input type="checkbox"/><br>1 |
| PFA56* | Are you able to get in and out of a car?.....               | <input type="checkbox"/><br>5 | <input type="checkbox"/><br>4  | <input type="checkbox"/><br>3 | <input type="checkbox"/><br>2 | <input type="checkbox"/><br>1 |
| PFA8   | Are you able to move a chair from one room to another?..... | <input type="checkbox"/><br>5 | <input type="checkbox"/><br>4  | <input type="checkbox"/><br>3 | <input type="checkbox"/><br>2 | <input type="checkbox"/><br>1 |

|       |                                                                                        | Without<br>any<br>difficulty  | With a<br>little<br>difficulty | With<br>some<br>difficulty    | With<br>much<br>difficulty    | Unable<br>to do               |
|-------|----------------------------------------------------------------------------------------|-------------------------------|--------------------------------|-------------------------------|-------------------------------|-------------------------------|
| PFA9* | Are you able to bend down and pick up clothing from the floor?.....                    | <input type="checkbox"/><br>5 | <input type="checkbox"/><br>4  | <input type="checkbox"/><br>3 | <input type="checkbox"/><br>2 | <input type="checkbox"/><br>1 |
| PFB10 | Are you able to climb up five steps?.....                                              | <input type="checkbox"/><br>5 | <input type="checkbox"/><br>4  | <input type="checkbox"/><br>3 | <input type="checkbox"/><br>2 | <input type="checkbox"/><br>1 |
| PFB11 | Are you able to wash dishes, pots, and utensils by hand while standing at a sink?..... | <input type="checkbox"/><br>5 | <input type="checkbox"/><br>4  | <input type="checkbox"/><br>3 | <input type="checkbox"/><br>2 | <input type="checkbox"/><br>1 |
| PFB12 | Are you able to make a bed, including spreading and tucking in bed sheets?.....        | <input type="checkbox"/><br>5 | <input type="checkbox"/><br>4  | <input type="checkbox"/><br>3 | <input type="checkbox"/><br>2 | <input type="checkbox"/><br>1 |
| PFB13 | Are you able to carry a shopping bag or briefcase?.....                                | <input type="checkbox"/><br>5 | <input type="checkbox"/><br>4  | <input type="checkbox"/><br>3 | <input type="checkbox"/><br>2 | <input type="checkbox"/><br>1 |
| PFB14 | Are you able to take a tub bath?.....                                                  | <input type="checkbox"/><br>5 | <input type="checkbox"/><br>4  | <input type="checkbox"/><br>3 | <input type="checkbox"/><br>2 | <input type="checkbox"/><br>1 |
| PFB15 | Are you able to change the bulb in a table lamp?.....                                  | <input type="checkbox"/><br>5 | <input type="checkbox"/><br>4  | <input type="checkbox"/><br>3 | <input type="checkbox"/><br>2 | <input type="checkbox"/><br>1 |
| PFB16 | Are you able to press with your index finger (for example ringing a doorbell)?.....    | <input type="checkbox"/><br>5 | <input type="checkbox"/><br>4  | <input type="checkbox"/><br>3 | <input type="checkbox"/><br>2 | <input type="checkbox"/><br>1 |



|       |                                                                        | <b>Without<br/>any<br/>difficulty</b> | <b>With a<br/>little<br/>difficulty</b> | <b>With<br/>some<br/>difficulty</b> | <b>With<br/>much<br/>difficulty</b> | <b>Unable<br/>to do</b>       |
|-------|------------------------------------------------------------------------|---------------------------------------|-----------------------------------------|-------------------------------------|-------------------------------------|-------------------------------|
| PFB17 | Are you able to put on and take off your socks?....                    | <input type="checkbox"/><br>5         | <input type="checkbox"/><br>4           | <input type="checkbox"/><br>3       | <input type="checkbox"/><br>2       | <input type="checkbox"/><br>1 |
| PFB18 | Are you able to shave your face or apply<br>makeup?.....               | <input type="checkbox"/><br>5         | <input type="checkbox"/><br>4           | <input type="checkbox"/><br>3       | <input type="checkbox"/><br>2       | <input type="checkbox"/><br>1 |
| PFB19 | Are you able to squeeze a new tube of<br>toothpaste?.....              | <input type="checkbox"/><br>5         | <input type="checkbox"/><br>4           | <input type="checkbox"/><br>3       | <input type="checkbox"/><br>2       | <input type="checkbox"/><br>1 |
| PFB20 | Are you able to cut a piece of paper with<br>scissors?.....            | <input type="checkbox"/><br>5         | <input type="checkbox"/><br>4           | <input type="checkbox"/><br>3       | <input type="checkbox"/><br>2       | <input type="checkbox"/><br>1 |
| PFB21 | Are you able to pick up coins from a table<br>top?.....                | <input type="checkbox"/><br>5         | <input type="checkbox"/><br>4           | <input type="checkbox"/><br>3       | <input type="checkbox"/><br>2       | <input type="checkbox"/><br>1 |
| PFB22 | Are you able to hold a plate full of food?.....                        | <input type="checkbox"/><br>5         | <input type="checkbox"/><br>4           | <input type="checkbox"/><br>3       | <input type="checkbox"/><br>2       | <input type="checkbox"/><br>1 |
| PFB23 | Are you able to pour liquid from a bottle into a<br>glass?.....        | <input type="checkbox"/><br>5         | <input type="checkbox"/><br>4           | <input type="checkbox"/><br>3       | <input type="checkbox"/><br>2       | <input type="checkbox"/><br>1 |
| PFB24 | Are you able to run a short distance, such as to<br>catch a bus? ..... | <input type="checkbox"/><br>5         | <input type="checkbox"/><br>4           | <input type="checkbox"/><br>3       | <input type="checkbox"/><br>2       | <input type="checkbox"/><br>1 |

|          |                                                                 | Without<br>any<br>difficulty  | With a<br>little<br>difficulty | With<br>some<br>difficulty    | With<br>much<br>difficulty    | Unable<br>to do               |
|----------|-----------------------------------------------------------------|-------------------------------|--------------------------------|-------------------------------|-------------------------------|-------------------------------|
| PFB25    | Are you able to push open a door after turning the knob?.....   | <input type="checkbox"/><br>5 | <input type="checkbox"/><br>4  | <input type="checkbox"/><br>3 | <input type="checkbox"/><br>2 | <input type="checkbox"/><br>1 |
| PFB26    | Are you able to shampoo your hair?.....                         | <input type="checkbox"/><br>5 | <input type="checkbox"/><br>4  | <input type="checkbox"/><br>3 | <input type="checkbox"/><br>2 | <input type="checkbox"/><br>1 |
| PFB27    | Are you able to tie a knot or a bow?.....                       | <input type="checkbox"/><br>5 | <input type="checkbox"/><br>4  | <input type="checkbox"/><br>3 | <input type="checkbox"/><br>2 | <input type="checkbox"/><br>1 |
| PFB28r1* | Are you able to lift 10 pounds (5 kg) above your shoulder?..... | <input type="checkbox"/><br>5 | <input type="checkbox"/><br>4  | <input type="checkbox"/><br>3 | <input type="checkbox"/><br>2 | <input type="checkbox"/><br>1 |
| PFB29    | Are you able to lift a full cup or glass to your mouth?.....    | <input type="checkbox"/><br>5 | <input type="checkbox"/><br>4  | <input type="checkbox"/><br>3 | <input type="checkbox"/><br>2 | <input type="checkbox"/><br>1 |
| PFB30    | Are you able to open a new milk carton?.....                    | <input type="checkbox"/><br>5 | <input type="checkbox"/><br>4  | <input type="checkbox"/><br>3 | <input type="checkbox"/><br>2 | <input type="checkbox"/><br>1 |
| PFB31    | Are you able to open car doors?.....                            | <input type="checkbox"/><br>5 | <input type="checkbox"/><br>4  | <input type="checkbox"/><br>3 | <input type="checkbox"/><br>2 | <input type="checkbox"/><br>1 |
| PFB32    | Are you able to stand unsupported for 10 minutes?.....          | <input type="checkbox"/><br>5 | <input type="checkbox"/><br>4  | <input type="checkbox"/><br>3 | <input type="checkbox"/><br>2 | <input type="checkbox"/><br>1 |
| PFB33    | Are you able to remove something from your back pocket?.....    | <input type="checkbox"/><br>5 | <input type="checkbox"/><br>4  | <input type="checkbox"/><br>3 | <input type="checkbox"/><br>2 | <input type="checkbox"/><br>1 |

|         |                                                                                            | Without<br>any<br>difficulty  | With a<br>little<br>difficulty | With<br>some<br>difficulty    | With<br>much<br>difficulty    | Unable<br>to do               |
|---------|--------------------------------------------------------------------------------------------|-------------------------------|--------------------------------|-------------------------------|-------------------------------|-------------------------------|
| PFB34   | Are you able to change a light bulb overhead?.....                                         | <input type="checkbox"/><br>5 | <input type="checkbox"/><br>4  | <input type="checkbox"/><br>3 | <input type="checkbox"/><br>2 | <input type="checkbox"/><br>1 |
| PFB36   | Are you able to put on a pullover sweater?.....                                            | <input type="checkbox"/><br>5 | <input type="checkbox"/><br>4  | <input type="checkbox"/><br>3 | <input type="checkbox"/><br>2 | <input type="checkbox"/><br>1 |
| PFB37   | Are you able to turn faucets on and off?.....                                              | <input type="checkbox"/><br>5 | <input type="checkbox"/><br>4  | <input type="checkbox"/><br>3 | <input type="checkbox"/><br>2 | <input type="checkbox"/><br>1 |
| PFB39r1 | Are you able to reach and get down a 5 pound (2 kg) object from above your head?.....      | <input type="checkbox"/><br>5 | <input type="checkbox"/><br>4  | <input type="checkbox"/><br>3 | <input type="checkbox"/><br>2 | <input type="checkbox"/><br>1 |
| PFB40   | Are you able to stand up on tiptoes?.....                                                  | <input type="checkbox"/><br>5 | <input type="checkbox"/><br>4  | <input type="checkbox"/><br>3 | <input type="checkbox"/><br>2 | <input type="checkbox"/><br>1 |
| PFB41   | Are you able to trim your fingernails?.....                                                | <input type="checkbox"/><br>5 | <input type="checkbox"/><br>4  | <input type="checkbox"/><br>3 | <input type="checkbox"/><br>2 | <input type="checkbox"/><br>1 |
| PFB42   | Are you able to stand unsupported for 30 minutes?.....                                     | <input type="checkbox"/><br>5 | <input type="checkbox"/><br>4  | <input type="checkbox"/><br>3 | <input type="checkbox"/><br>2 | <input type="checkbox"/><br>1 |
| PFB56r1 | Are you able to lift one pound (0.5 kg) to shoulder level without bending your elbow?..... | <input type="checkbox"/><br>5 | <input type="checkbox"/><br>4  | <input type="checkbox"/><br>3 | <input type="checkbox"/><br>2 | <input type="checkbox"/><br>1 |

|         |                                                                               | Without<br>any<br>difficulty  | With a<br>little<br>difficulty | With<br>some<br>difficulty    | With<br>much<br>difficulty    | Unable<br>to do               |
|---------|-------------------------------------------------------------------------------|-------------------------------|--------------------------------|-------------------------------|-------------------------------|-------------------------------|
| PFB8r1  | Are you able to carry two bags filled with groceries 100 yards (100 m)? ..... | <input type="checkbox"/><br>5 | <input type="checkbox"/><br>4  | <input type="checkbox"/><br>3 | <input type="checkbox"/><br>2 | <input type="checkbox"/><br>1 |
| PFB9    | Are you able to jump up and down?.....                                        | <input type="checkbox"/><br>5 | <input type="checkbox"/><br>4  | <input type="checkbox"/><br>3 | <input type="checkbox"/><br>2 | <input type="checkbox"/><br>1 |
| PFC13r1 | Are you able to run 100 yards (100 m)?.....                                   | <input type="checkbox"/><br>5 | <input type="checkbox"/><br>4  | <input type="checkbox"/><br>3 | <input type="checkbox"/><br>2 | <input type="checkbox"/><br>1 |
| PFC29   | Are you able to walk up and down two steps? .....                             | <input type="checkbox"/><br>5 | <input type="checkbox"/><br>4  | <input type="checkbox"/><br>3 | <input type="checkbox"/><br>2 | <input type="checkbox"/><br>1 |
| PFC31   | Are you able to reach into a low cupboard?.....                               | <input type="checkbox"/><br>5 | <input type="checkbox"/><br>4  | <input type="checkbox"/><br>3 | <input type="checkbox"/><br>2 | <input type="checkbox"/><br>1 |
| PFC32   | Are you able to climb up 5 flights of stairs?.....                            | <input type="checkbox"/><br>5 | <input type="checkbox"/><br>4  | <input type="checkbox"/><br>3 | <input type="checkbox"/><br>2 | <input type="checkbox"/><br>1 |
| PFC33r1 | Are you able to run ten miles (16 km)?.....                                   | <input type="checkbox"/><br>5 | <input type="checkbox"/><br>4  | <input type="checkbox"/><br>3 | <input type="checkbox"/><br>2 | <input type="checkbox"/><br>1 |
| PFC38   | Are you able to walk at a normal speed?.....                                  | <input type="checkbox"/><br>5 | <input type="checkbox"/><br>4  | <input type="checkbox"/><br>3 | <input type="checkbox"/><br>2 | <input type="checkbox"/><br>1 |
| PFC39   | Are you able to stand without losing your balance for several minutes?.....   | <input type="checkbox"/><br>5 | <input type="checkbox"/><br>4  | <input type="checkbox"/><br>3 | <input type="checkbox"/><br>2 | <input type="checkbox"/><br>1 |
| PFC40   | Are you able to kneel on the floor?.....                                      | <input type="checkbox"/><br>5 | <input type="checkbox"/><br>4  | <input type="checkbox"/><br>3 | <input type="checkbox"/><br>2 | <input type="checkbox"/><br>1 |

|         |                                                                                                     | Without<br>any<br>difficulty  | With a<br>little<br>difficulty | With<br>some<br>difficulty    | With<br>much<br>difficulty    | Unable<br>to do               |
|---------|-----------------------------------------------------------------------------------------------------|-------------------------------|--------------------------------|-------------------------------|-------------------------------|-------------------------------|
| PFC41   | Are you able to sit down in and stand up from a low, soft couch?.....                               | <input type="checkbox"/><br>5 | <input type="checkbox"/><br>4  | <input type="checkbox"/><br>3 | <input type="checkbox"/><br>2 | <input type="checkbox"/><br>1 |
| PFC43   | Are you able to use your hands, such as for turning faucets, using kitchen gadgets, or sewing?..... | <input type="checkbox"/><br>5 | <input type="checkbox"/><br>4  | <input type="checkbox"/><br>3 | <input type="checkbox"/><br>2 | <input type="checkbox"/><br>1 |
| PFC45r1 | Are you able to sit on and get up from the toilet?.....                                             | <input type="checkbox"/><br>5 | <input type="checkbox"/><br>4  | <input type="checkbox"/><br>3 | <input type="checkbox"/><br>2 | <input type="checkbox"/><br>1 |
| PFC46   | Are you able to transfer from a bed to a chair and back?.....                                       | <input type="checkbox"/><br>5 | <input type="checkbox"/><br>4  | <input type="checkbox"/><br>3 | <input type="checkbox"/><br>2 | <input type="checkbox"/><br>1 |
| PFC47   | Are you able to be out of bed most of the day?.....                                                 | <input type="checkbox"/><br>5 | <input type="checkbox"/><br>4  | <input type="checkbox"/><br>3 | <input type="checkbox"/><br>2 | <input type="checkbox"/><br>1 |
| PFC49   | Are you able to water a house plant?.....                                                           | <input type="checkbox"/><br>5 | <input type="checkbox"/><br>4  | <input type="checkbox"/><br>3 | <input type="checkbox"/><br>2 | <input type="checkbox"/><br>1 |
| PFC51   | Are you able to wipe yourself after using the toilet?.....                                          | <input type="checkbox"/><br>5 | <input type="checkbox"/><br>4  | <input type="checkbox"/><br>3 | <input type="checkbox"/><br>2 | <input type="checkbox"/><br>1 |
| PFC52   | Are you able to turn from side to side in bed?.....                                                 | <input type="checkbox"/><br>5 | <input type="checkbox"/><br>4  | <input type="checkbox"/><br>3 | <input type="checkbox"/><br>2 | <input type="checkbox"/><br>1 |
| PFC53   | Are you able to get in and out of bed?.....                                                         | <input type="checkbox"/><br>5 | <input type="checkbox"/><br>4  | <input type="checkbox"/><br>3 | <input type="checkbox"/><br>2 | <input type="checkbox"/><br>1 |

|        |                                                                                                                                              | <b>Without<br/>any<br/>difficulty</b> | <b>With a<br/>little<br/>difficulty</b> | <b>With<br/>some<br/>difficulty</b> | <b>With<br/>much<br/>difficulty</b> | <b>Unable<br/>to do</b>       |
|--------|----------------------------------------------------------------------------------------------------------------------------------------------|---------------------------------------|-----------------------------------------|-------------------------------------|-------------------------------------|-------------------------------|
| PFC6r1 | Are you able to walk a block (100 m) on flat ground?.....                                                                                    | <input type="checkbox"/><br>5         | <input type="checkbox"/><br>4           | <input type="checkbox"/><br>3       | <input type="checkbox"/><br>2       | <input type="checkbox"/><br>1 |
| PFC7r1 | Are you able to run five miles (8 km)? .....                                                                                                 | <input type="checkbox"/><br>5         | <input type="checkbox"/><br>4           | <input type="checkbox"/><br>3       | <input type="checkbox"/><br>2       | <input type="checkbox"/><br>1 |
|        |                                                                                                                                              |                                       |                                         |                                     |                                     |                               |
|        |                                                                                                                                              | <b>Not at all</b>                     | <b>Very little</b>                      | <b>Somewhat</b>                     | <b>Quite a lot</b>                  | <b>Cannot do</b>              |
| PFA1   | Does your health now limit you in doing vigorous activities, such as running, lifting heavy objects, participating in strenuous sports?..... | <input type="checkbox"/><br>5         | <input type="checkbox"/><br>4           | <input type="checkbox"/><br>3       | <input type="checkbox"/><br>2       | <input type="checkbox"/><br>1 |
| PFA3   | Does your health now limit you in bending, kneeling, or stooping? .....                                                                      | <input type="checkbox"/><br>5         | <input type="checkbox"/><br>4           | <input type="checkbox"/><br>3       | <input type="checkbox"/><br>2       | <input type="checkbox"/><br>1 |
| PFA4   | Does your health now limit you in doing heavy work around the house like scrubbing floors, or lifting or moving heavy furniture? .....       | <input type="checkbox"/><br>5         | <input type="checkbox"/><br>4           | <input type="checkbox"/><br>3       | <input type="checkbox"/><br>2       | <input type="checkbox"/><br>1 |
| PFA5   | Does your health now limit you in lifting or carrying groceries? .....                                                                       | <input type="checkbox"/><br>5         | <input type="checkbox"/><br>4           | <input type="checkbox"/><br>3       | <input type="checkbox"/><br>2       | <input type="checkbox"/><br>1 |
| PFA6*  | Does your health now limit you in bathing or dressing yourself?.....                                                                         | <input type="checkbox"/><br>5         | <input type="checkbox"/><br>4           | <input type="checkbox"/><br>3       | <input type="checkbox"/><br>2       | <input type="checkbox"/><br>1 |

|        |                                                                                                                                          | <b>Not at all</b>             | <b>Very little</b>            | <b>Somewhat</b>               | <b>Quite a lot</b>            | <b>Cannot do</b>              |
|--------|------------------------------------------------------------------------------------------------------------------------------------------|-------------------------------|-------------------------------|-------------------------------|-------------------------------|-------------------------------|
| PFB1   | Does your health now limit you in doing moderate work around the house like vacuuming, sweeping floors or carrying in groceries? .....   | <input type="checkbox"/><br>5 | <input type="checkbox"/><br>4 | <input type="checkbox"/><br>3 | <input type="checkbox"/><br>2 | <input type="checkbox"/><br>1 |
| PFB3*  | Does your health now limit you in putting a trash bag outside?.....                                                                      | <input type="checkbox"/><br>5 | <input type="checkbox"/><br>4 | <input type="checkbox"/><br>3 | <input type="checkbox"/><br>2 | <input type="checkbox"/><br>1 |
| PFB43  | Does your health now limit you in taking care of your personal needs (dress, comb hair, toilet, eat, bathe)? .....                       | <input type="checkbox"/><br>5 | <input type="checkbox"/><br>4 | <input type="checkbox"/><br>3 | <input type="checkbox"/><br>2 | <input type="checkbox"/><br>1 |
| PFB44* | Does your health now limit you in doing moderate activities, such as moving a table, pushing a vacuum cleaner, bowling, or playing golf? | <input type="checkbox"/><br>5 | <input type="checkbox"/><br>4 | <input type="checkbox"/><br>3 | <input type="checkbox"/><br>2 | <input type="checkbox"/><br>1 |
| PFB48  | Does your health now limit you in taking a shower?.....                                                                                  | <input type="checkbox"/><br>5 | <input type="checkbox"/><br>4 | <input type="checkbox"/><br>3 | <input type="checkbox"/><br>2 | <input type="checkbox"/><br>1 |
| PFB49  | Does your health now limit you in going for a short walk (less than 15 minutes)?.....                                                    | <input type="checkbox"/><br>5 | <input type="checkbox"/><br>4 | <input type="checkbox"/><br>3 | <input type="checkbox"/><br>2 | <input type="checkbox"/><br>1 |
| PFB5r1 | Does your health now limit you in hiking a couple of miles (3 km) on uneven surfaces, including hills? .....                             | <input type="checkbox"/><br>5 | <input type="checkbox"/><br>4 | <input type="checkbox"/><br>3 | <input type="checkbox"/><br>2 | <input type="checkbox"/><br>1 |
| PFB51  | Does your health now limit you in participating in active sports such as swimming, tennis, or basketball?.....                           | <input type="checkbox"/><br>5 | <input type="checkbox"/><br>4 | <input type="checkbox"/><br>3 | <input type="checkbox"/><br>2 | <input type="checkbox"/><br>1 |

|         |                                                                                                                                      | <b>Not at all</b>             | <b>Very little</b>            | <b>Somewhat</b>               | <b>Quite a lot</b>            | <b>Cannot do</b>              |
|---------|--------------------------------------------------------------------------------------------------------------------------------------|-------------------------------|-------------------------------|-------------------------------|-------------------------------|-------------------------------|
| PFB54   | Does your health now limit you in going OUTSIDE the home, for example to shop or visit a doctor's office?.....                       | <input type="checkbox"/><br>5 | <input type="checkbox"/><br>4 | <input type="checkbox"/><br>3 | <input type="checkbox"/><br>2 | <input type="checkbox"/><br>1 |
| PFB7    | Does your health now limit you in doing strenuous activities such as backpacking, skiing, playing tennis, bicycling or jogging?..... | <input type="checkbox"/><br>5 | <input type="checkbox"/><br>4 | <input type="checkbox"/><br>3 | <input type="checkbox"/><br>2 | <input type="checkbox"/><br>1 |
| PFC10   | Does your health now limit you in climbing several flights of stairs?.....                                                           | <input type="checkbox"/><br>5 | <input type="checkbox"/><br>4 | <input type="checkbox"/><br>3 | <input type="checkbox"/><br>2 | <input type="checkbox"/><br>1 |
| PFC12   | Does your health now limit you in doing two hours of physical labor?.....                                                            | <input type="checkbox"/><br>5 | <input type="checkbox"/><br>4 | <input type="checkbox"/><br>3 | <input type="checkbox"/><br>2 | <input type="checkbox"/><br>1 |
| PFC35   | Does your health now limit you in doing eight hours of physical labor?.....                                                          | <input type="checkbox"/><br>5 | <input type="checkbox"/><br>4 | <input type="checkbox"/><br>3 | <input type="checkbox"/><br>2 | <input type="checkbox"/><br>1 |
| PFC36r1 | Does your health now limit you in walking more than a mile (1.6 km)? .....                                                           | <input type="checkbox"/><br>5 | <input type="checkbox"/><br>4 | <input type="checkbox"/><br>3 | <input type="checkbox"/><br>2 | <input type="checkbox"/><br>1 |
| PFC37   | Does your health now limit you in climbing one flight of stairs?.....                                                                | <input type="checkbox"/><br>5 | <input type="checkbox"/><br>4 | <input type="checkbox"/><br>3 | <input type="checkbox"/><br>2 | <input type="checkbox"/><br>1 |
| PFC54   | Does your health now limit you in getting in and out of the bathtub?.....                                                            | <input type="checkbox"/><br>5 | <input type="checkbox"/><br>4 | <input type="checkbox"/><br>3 | <input type="checkbox"/><br>2 | <input type="checkbox"/><br>1 |



|       |                                                                                                    | <b>Not at all</b>             | <b>Very little</b>                | <b>Somewhat</b>               | <b>Quite a lot</b>            | <b>Cannot do</b>                  |
|-------|----------------------------------------------------------------------------------------------------|-------------------------------|-----------------------------------|-------------------------------|-------------------------------|-----------------------------------|
| PFC56 | Does your health now limit you in walking about the house?.....                                    | <input type="checkbox"/><br>5 | <input type="checkbox"/><br>4     | <input type="checkbox"/><br>3 | <input type="checkbox"/><br>2 | <input type="checkbox"/><br>1     |
|       |                                                                                                    | <b>No difficulty at all</b>   | <b>A little bit of difficulty</b> | <b>Some difficulty</b>        | <b>A lot of difficulty</b>    | <b>Can't do because of health</b> |
| PFB50 | How much difficulty do you have doing your daily physical activities, because of your health?..... | <input type="checkbox"/><br>5 | <input type="checkbox"/><br>4     | <input type="checkbox"/><br>3 | <input type="checkbox"/><br>2 | <input type="checkbox"/><br>1     |
